# Supplementary material for: Identification and Expression Analysis of the Alfin-like Gene Family in Tomato and the Role of SlAL3 in Salt and Drought Stresses
Source: Plants (Basel). 2023 Jul 31;12(15):2829. doi: 10.3390/plants12152829 (PMC10421131; doi:10.3390/plants12152829)
Supplement: Supplementary file 1 [file plants-12-02829-s001.zip]

Archive with 8 entries (8 files):
- Supplementary figure.pdf
- Table S1.xlsx
- Table S2.xlsx
- Table S3.xlsx
- Table S4.xlsx
- Table S5.xlsx
- Table S6.xlsx
- Table S7.xlsx
