# Supplementary material for: Identification and Expression Analysis of the Alfin-like Gene Family in Tomato and the Role of SlAL3 in Salt and Drought Stresses
Source: Plants (Basel). 2023 Jul 31;12(15):2829. doi: 10.3390/plants12152829 (PMC10421131; doi:10.3390/plants12152829)
Supplement: Supplementary file 1 [file plants-12-02829-s001.zip › Table S1.xlsx]

## Sheet: Sheet1
Table S1. ALs genes candidates identified in tomato.
Name	GeneID	Length	GRAVY	MW	PI	Instability index	CELLO localization (reliability)
SlAL1	Solyc01g102750.3.1	249	-0.651	28121.7	5.09	60.42	Nuclear (1.556)
SlAL2	Solyc01g102760.3.1	248	-0.669	27949.4	4.98	62.3	Cytoplasmic (1.813)
SlAL3	Solyc03g121930.3.1	276	-0.837	31517.2	4.73	43.65	Nuclear (1.769)
SlAL4	Solyc05g032770.3.1	246	-0.665	27837.3	5.08	54.05	Nuclear (1.861)
SlAL5	Solyc06g051420.3.1	245	-0.802	27847	5.29	53.15	Nuclear (2.618)
SlAL6	Solyc06g062850.3.1	257	-0.753	29100.6	5	53.13	Nuclear (1.935)
SlAL7	Solyc07g041190.3.1	246	-0.748	28124.5	5.13	46.28	Nuclear (2.519)
SlAL8	Solyc09g005360.3.1	241	-0.625	27310.7	5.32	60.28	Nuclear (1.243)
SlAL9	Solyc10g076690.2.1	240	-0.659	27134.5	5.77	54.2	Nuclear (2.634)
SlAL10	Solyc10g085180.2.1	240	-0.586	27176.7	5.44	47.91	Nuclear (1.436)
SlAL11	Solyc12g096040.2.1	255	-0.705	28981.4	5.05	55.96	Nuclear (2.178)
SlydAL1	Solyd03g083350.1	274	-0.838	31378.2	4.89	45.87	Nuclear (1.791)
SlydAL2	Solyd06g057570.1	298	-0.748	33926.9	5.68	54.3	Nuclear (2.603)
SlydAL3	Solyd06g068620.1	266	-0.637	30191.1	5.43	52.98	Cytoplasmic (1.613)
SlydAL4	Solyd09g050350.1	241	-0.625	27310.7	5.32	60.28	Nuclear (2.523)
SlydAL5	Solyd10g065310.1	240	-0.659	27134.5	5.77	54.2	Nuclear (2.634)
SlydAL6	Solyd10g066810.1	229	-0.554	25764.1	5.85	38.56	Nuclear (1.422)
SlydAL7	Solyd10g066850.1	240	-0.564	27031.5	5.35	40.13	Nuclear (1.682)
SlydAL8	Solyd12g071390.1	255	-0.714	28953.3	5.05	55.96	Nuclear (2.047)
SPiAL1	SPI01g07888.1	213	-0.673	23965.1	5.39	60.79	Nuclear (2.035)
SPiAL2	SPI01g07889.1	248	-0.669	27949.4	4.98	62.3	Cytoplasmic (1.813)
SPiAL3	SPI03g05453.1	276	-0.837	31517.2	4.73	43.65	Nuclear (1.769)
SPiAL4	SPI05g03403.1	246	-0.665	27837.3	5.08	54.05	Nuclear (1.861)
SPiAL5	SPI06g03417.1	245	-0.802	27847	5.29	53.15	Nuclear (2.618)
SPiAL6	SPI06g03937.1	257	-0.753	29114.6	5	53.13	Nuclear (1.845)
SPiAL7	SPI07g04250.1	246	-0.738	28094.4	5.13	46.62	Nuclear (2.421)
SPiAL8	SPI10g04361.1	224	-0.575	25272.5	5.45	49.38	Extracellular (1.670)
SPiAL9	SPI12g04824.1	255	-0.705	28981.4	5.05	55.96	Nuclear (2.178)
SpAL1	Sopen01g045170.1	248	-0.64	28006.6	5.16	60.39	Nuclear (1.465)
SpAL2	Sopen01g045180.1	249	-0.68	28078.5	4.93	63.4	Cytoplasmic (1.755)
SpAL3	Sopen03g040750.1	275	-0.844	31510.3	4.78	47.15	Nuclear (1.975)
SpAL4	Sopen05g023730.1	246	-0.665	27837.3	5.08	54.05	Nuclear (1.861)
SpAL5	Sopen06g017390.1	245	-0.791	27829	5.29	52.8	Nuclear (2.598)
SpAL6	Sopen06g022310.1	258	-0.762	29198.7	5	53.44	Nuclear (1.822)
SpAL7	Sopen06g022310.2	257	-0.752	29070.5	5	53.61	Nuclear (2.116)
SpAL8	Sopen07g020460.1	246	-0.738	28094.4	5.13	46.62	Nuclear (2.421)
SpAL9	Sopen09g001320.2	241	-0.625	27282.6	5.31	58.92	Nuclear (2.608)
SpAL10	Sopen10g028290.1	518	-0.659	59378.4	5.27	53.11	Nuclear (2.634)
SpAL11	Sopen10g034650.1	517	-0.69	59361.2	5.24	48.62	Nuclear (1.578)
SpAL12	Sopen12g031930.1	255	-0.714	28953.3	5.05	55.96	Nuclear (2.047)
Length (AA): the length of the protein in AA; MW (Da): molecular weight in Da; pl: isoelectric point; GRAVY grand average of hydropathy.
