# Supplementary material for: Identification and Expression Analysis of the Alfin-like Gene Family in Tomato and the Role of SlAL3 in Salt and Drought Stresses
Source: Plants (Basel). 2023 Jul 31;12(15):2829. doi: 10.3390/plants12152829 (PMC10421131; doi:10.3390/plants12152829)
Supplement: Supplementary file 1 [file plants-12-02829-s001.zip › Table S2.xlsx]

## Sheet: Sheet1
Table S2 Classification and statistics of promoter cis-element
		LTR	MYB	MYC	MBS	MRE	MYB regonition site	W box	WUN-motif	WRE3
Abiotic stress	397	18	150	124	13	22	5	32	24	9
		ATCT-motif	Box 4	G-Box	GA-motif	Gap-box	GATA-motif	GT1-motif	I-box
Light Responsiveness	234	6	90	67	8	2	18	33	10
		CAT-box	GCN4-motif
Growth and Development	38	31	7
		ABRE	ABRE3a	ABRE4	ERE	GARE-motif	P-box
Phytohormone Responsiveness	175	59	11	11	76	5	13
		circadian
Circadian Control	10	10
ATCT-motif	0.007		G-Box	0.078		Gap-bpx	0.002		GT1-motif	0.038
Box 4	0.105		GA-motif	0.009		GATA-motif	0.021		I-box	0.011
