# Supplementary material for: Identification and Expression Analysis of the Alfin-like Gene Family in Tomato and the Role of SlAL3 in Salt and Drought Stresses
Source: Plants (Basel). 2023 Jul 31;12(15):2829. doi: 10.3390/plants12152829 (PMC10421131; doi:10.3390/plants12152829)
Supplement: Supplementary file 1 [file plants-12-02829-s001.zip › Table S3.xlsx]

## Sheet: Sheet2
Table S3.Cis-acting element types, start positions, and termination positions of ALs genes
gene	Start position	End position	Cis-acting element
SlAL1	180	190	GATA-motif
SlAL1	1047	1057	GATA-motif
SlAL1	523	529	MYC
SlAL1	545	551	MYC
SlAL1	1209	1215	MYC
SlAL1	54	63	WUN-motif
SlAL1	851	857	MYB
SlAL1	808	816	GA-motif
SlAL1	1642	1650	GA-motif
SlAL1	1327	1336	ATCT-motif
SlAL1	1794	1800	CAT-box
SlAL1	86	92	Box 4
SlAL1	622	628	Box 4
SlAL1	926	932	Box 4
SlAL1	1525	1531	Box 4
SlAL1	610	618	ERE
SlAL1	1102	1110	ERE
SlAL1	1230	1238	ERE
SlAL1	1374	1382	ERE
SlAL2	184	192	ERE
SlAL2	641	647	ABRE3a
SlAL2	635	642	GCN4_motif
SlAL2	88	94	Myb
SlAL2	1025	1031	Box 4
SlAL2	370	376	MYB
SlAL2	458	464	MYB
SlAL2	536	542	MYB
SlAL2	1092	1098	MYB
SlAL2	642	647	ABRE
SlAL2	831	836	ABRE
SlAL2	319	326	MRE
SlAL2	1066	1073	MRE
SlAL2	95	101	MYC
SlAL2	144	150	MYC
SlAL2	1157	1163	MYC
SlAL2	1221	1227	MYC
SlAL2	1365	1371	MYC
SlAL2	836	842	G-Box
SlAL2	647	653	ABRE4
SlAL2	641	647	G-box
SlAL2	160	166	LTR
SlAL3	1847	1853	MYB recognition site
SlAL3	1275	1283	ERE
SlAL3	194	200	CAT-box
SlAL3	737	743	CAT-box
SlAL3	763	769	CAT-box
SlAL3	1175	1181	CAT-box
SlAL3	63	69	Box 4
SlAL3	1798	1804	Box 4
SlAL3	372	379	GCN4_motif
SlAL3	1683	1692	ATCT-motif
SlAL3	1425	1432	MRE
SlAL3	434	439	ABRE
SlAL3	1191	1200	ABRE
SlAL3	205	211	W box
SlAL3	530	536	W box
SlAL3	655	661	W box
SlAL3	427	433	G-Box
SlAL3	1415	1422	GT1-motif
SlAL3	1417	1423	GT1-motif
SlAL3	159	165	MYC
SlAL3	397	403	MYC
SlAL3	1755	1761	MYC
SlAL4	1728	1734	LTR
SlAL4	621	627	G-box
SlAL4	770	776	G-box
SlAL4	903	909	G-box
SlAL4	952	959	GATA-motif
SlAL4	1136	1142	MYC
SlAL4	1144	1150	MYC
SlAL4	1299	1305	MYC
SlAL4	1307	1313	MYC
SlAL4	1864	1870	MYC
SlAL4	628	633	ABRE
SlAL4	765	770	ABRE
SlAL4	461	467	MYB
SlAL4	698	704	MYB
SlAL4	940	946	MYB
SlAL4	1790	1796	MYB
SlAL4	1118	1124	Box 4
SlAL4	1281	1287	Box 4
SlAL4	605	611	Myb
SlAL4	1267	1273	Myb
SlAL4	1400	1406	Myb
SlAL4	206	214	ERE
SlAL4	1631	1639	ERE
SlAL4	555	564	circadian
SlAL5	207	212	ABRE
SlAL5	452	458	W box
SlAL5	1305	1311	W box
SlAL5	1479	1485	W box
SlAL5	568	574	MYB
SlAL5	600	606	MYB
SlAL5	1795	1801	MYB
SlAL5	404	411	P-box
SlAL5	206	212	G-box
SlAL5	345	351	LTR
SlAL5	920	926	LTR
SlAL5	200	206	ABRE4
SlAL5	237	243	MYC
SlAL5	734	740	MYC
SlAL5	206	212	ABRE3a
SlAL5	1705	1713	ERE
SlAL5	1699	1707	ERE
SlAL5	1907	1915	ERE
SlAL6	1130	1139.5	Gap-box
SlAL6	1143	1149	Myb
SlAL6	33	39	Box 4
SlAL6	867	873	Box 4
SlAL6	1970	1976	CAT-box
SlAL6	1143	1149	MBS
SlAL6	1717	1723	WRE3
SlAL6	1625	1632	MRE
SlAL6	1797	1804	MRE
SlAL6	113	119	MYB
SlAL6	574	580	MYB
SlAL6	1062	1068	MYB
SlAL6	1684	1690	MYB
SlAL6	661	667	G-box
SlAL6	760	766	G-box
SlAL6	592	601	WUN-motif
SlAL6	210	217	P-box
SlAL6	1069	1075	GT1-motif
SlAL6	1675	1682	GT1-motif
SlAL6	1677	1683	GT1-motif
SlAL6	316	322	MYC
SlAL6	758	764	MYC
SlAL6	782	788	MYC
SlAL6	908	914	MYC
SlAL6	1031	1037	MYC
SlAL6	1046	1052	MYC
SlAL6	1124	1130	MYC
SlAL6	1247	1253	MYC
SlAL6	1554	1560	MYC
SlAL7	1770	1776	ABRE3a
SlAL7	699	707	ERE
SlAL7	1557	1565	ERE
SlAL7	1803	1811	ERE
SlAL7	641	647	Box 4
SlAL7	720	726	Box 4
SlAL7	757	763	Box 4
SlAL7	1568	1574	Box 4
SlAL7	1472	1478	Myb
SlAL7	1755	1764	I-box
SlAL7	1771	1776	ABRE
SlAL7	1847	1852	ABRE
SlAL7	925	931	MYB
SlAL7	1776	1782	ABRE4
SlAL7	1770	1776	G-box
SlAL7	1852	1858	G-box
SlAL7	411	417	MYC
SlAL7	1817	1823	MYC
SlAL7	873	880	GT1-motif
SlAL8	1040	1047	MRE
SlAL8	1729	1736	MRE
SlAL8	161	167	MYB
SlAL8	1108	1114	MYB
SlAL8	1118	1124	MYB
SlAL8	1158	1164	MYB
SlAL8	1243	1249	MYB
SlAL8	1622	1628	MYB
SlAL8	1814	1820	W box
SlAL8	1961	1969	WUN-motif
SlAL8	458	467	GATA-motif
SlAL8	611	617	MYC
SlAL8	792	798	MYC
SlAL8	1927	1933	MYC
SlAL8	1719	1726	GT1-motif
SlAL8	1721	1727	GT1-motif
SlAL8	658	667	circadian
SlAL8	407	413	Myb
SlAL8	918	924	Myb
SlAL8	931	937	Myb
SlAL8	1955	1961	Myb
SlAL8	418	424	Box 4
SlAL8	1665	1671	Box 4
SlAL8	154	161	GARE-motif
SlAL8	918	924	MBS
SlAL8	1955	1961	MBS
SlAL8	801	807	WRE3
SlAL9	1481	1488	P-box
SlAL9	85	94	G-box
SlAL9	206	212	G-box
SlAL9	212	218	ABRE4
SlAL9	415	422	GATA-motif
SlAL9	604	610	MYC
SlAL9	1809	1815	MYC
SlAL9	207	212	ABRE
SlAL9	1723	1729	W box
SlAL9	1835	1841	W box
SlAL9	947	953	CAT-box
SlAL9	594	600	Box 4
SlAL9	1242	1248	Box 4
SlAL9	1322	1328	Box 4
SlAL9	1350	1356	Box 4
SlAL9	1359	1365	Box 4
SlAL9	1684	1690	Box 4
SlAL9	88	97	I-box
SlAL9	206	212	ABRE3a
SlAL9	1013	1021	ERE
SlAL9	1007	1015	ERE
SlAL9	1307	1315	ERE
SlAL10	747	755	ERE
SlAL10	1256	1264	ERE
SlAL10	1378	1386	ERE
SlAL10	1396	1404	ERE
SlAL10	1449	1457	ERE
SlAL10	541	547	Box 4
SlAL10	875	881	Box 4
SlAL10	1302	1308	Box 4
SlAL10	1786	1792	Box 4
SlAL10	703	709	MYB
SlAL10	1307	1313	MYB
SlAL10	656	662	MYC
SlAL10	817	823	MYC
SlAL10	1238	1244	MYC
SlAL10	1438	1444	MYC
SlAL10	1190	1199	WUN-motif
SlAL10	1192	1200	WUN-motif
SlAL11	303	309	ABRE3a
SlAL11	729	735	Box 4
SlAL11	231	240	I-box
SlAL11	1562	1570	GA-motif
SlAL11	364	370	W box
SlAL11	327	333	MYB
SlAL11	1325	1331	MYB
SlAL11	1527	1533	MYB
SlAL11	301	310	ABRE
SlAL11	304	309	ABRE
SlAL11	1006	1011	ABRE
SlAL11	1265	1270	ABRE
SlAL11	1026	1035	WUN-motif
SlAL11	303	309	G-box
SlAL11	999	1005	G-box
SlAL11	1262	1270	G-box
SlAL11	297	303	ABRE4
SlAL11	143	149	MYC
SlAL11	1734	1740	MYC
SlAL11	1520	1526	GT1-motif
SlAL11	811	818	GATA-motif
SlAL11	1270	1276	G-Box
SpiAL1	29	35	TCT-motif
SpiAL1	98	106	GA-motif
SpiAL1	932	940	GA-motif
SpiAL1	141	147	MYB
SpiAL1	911	917	MYB
SpiAL1	1550	1556	MYB
SpiAL1	1602	1608	MYB
SpiAL1	1722	1728	MYB
SpiAL1	1840	1846	MYB
SpiAL1	1981	1987	MYB
SpiAL1	506	511	ABRE
SpiAL1	511	517	G-box
SpiAL1	673	681	WUN-motif
SpiAL1	904	910	GT1-motif
SpiAL1	1729	1735	GT1-motif
SpiAL1	337	347	GATA-motif
SpiAL1	392	400	ERE
SpiAL1	520	528	ERE
SpiAL1	664	672	ERE
SpiAL1	216	222	Box 4
SpiAL1	821	827	Box 4
SpiAL1	1072	1078	CAT-box
SpiAL1	1824	1830	CAT-box
SpiAL1	1555	1562	GARE-motif
SpiAL1	1974	1981	GARE-motif
SpiAL2	627	633	G-box
SpiAL2	1788	1795	Myc
SpiAL2	145	151	LTR
SpiAL2	633	639	ABRE4
SpiAL2	1450	1457	GATA-motif
SpiAL2	821	827	G-Box
SpiAL2	80	86	MYC
SpiAL2	129	135	MYC
SpiAL2	1146	1152	MYC
SpiAL2	1210	1216	MYC
SpiAL2	1354	1360	MYC
SpiAL2	305	312	MRE
SpiAL2	1053	1060	MRE
SpiAL2	628	633	ABRE
SpiAL2	816	821	ABRE
SpiAL2	356	362	MYB
SpiAL2	444	450	MYB
SpiAL2	522	528	MYB
SpiAL2	1079	1085	MYB
SpiAL2	73	79	Myb
SpiAL2	1012	1018	Box 4
SpiAL2	621	628	GCN4_motif
SpiAL2	627	633	ABRE3a
SpiAL2	169	177	ERE
SpiAL3	91	97	MBS
SpiAL3	250	256	CAT-box
SpiAL3	1123	1129	CAT-box
SpiAL3	1734	1740	CAT-box
SpiAL3	91	97	Myb
SpiAL3	565	571	Box 4
SpiAL3	673	679	Box 4
SpiAL3	767	775	ERE
SpiAL3	788	796	ERE
SpiAL3	82	91	circadian
SpiAL3	1180	1186	G-Box
SpiAL3	145	151	MYC
SpiAL3	475	481	MYC
SpiAL3	1519	1525	MYC
SpiAL3	1143	1150	GT1-motif
SpiAL3	242	249	P-box
SpiAL3	815	821	LTR
SpiAL3	1187	1192	ABRE
SpiAL3	285	291	MYB
SpiAL3	1309	1315	MYB
SpiAL3	1313	1319	MYB
SpiAL3	73	79	W box
SpiAL3	161	167	W box
SpiAL3	1232	1238	W box
SpiAL3	569	576	MRE
SpiAL4	564	570	MYC
SpiAL4	791	797	MYC
SpiAL4	816	822	MYC
SpiAL4	1903	1909	MYC
SpiAL4	1909	1915	MYC
SpiAL4	1671	1678	P-box
SpiAL4	1285	1291	LTR
SpiAL4	1521	1527	MYB
SpiAL4	1554	1560	MYB
SpiAL4	1564	1570	MYB
SpiAL4	1812	1818	MYB
SpiAL4	592	599	MRE
SpiAL4	1569	1576	GARE-motif
SpiAL4	615	621	MBS
SpiAL4	44	50	CAT-box
SpiAL4	355	361	CAT-box
SpiAL4	166	172	Myb
SpiAL4	615	621	Myb
SpiAL4	622	628	Myb
SpiAL4	1932	1938	Myb
SpiAL4	1781	1787	Box 4
SpiAL4	959	968	circadian
SpiAL5	395	403	ERE
SpiAL5	365	374	circadian
SpiAL5	1210	1219	circadian
SpiAL5	1338	1344	Myb
SpiAL5	1388	1394	Myb
SpiAL5	1943	1949	Box 4
SpiAL5	765	772	GCN4_motif
SpiAL5	1311	1317	WRE3
SpiAL5	1344	1350	WRE3
SpiAL5	1370	1376	WRE3
SpiAL5	1411	1417	WRE3
SpiAL5	1538	1544	WRE3
SpiAL5	1616	1622	WRE3
SpiAL5	1338	1344	MBS
SpiAL5	1388	1394	MBS
SpiAL5	739	744	ABRE
SpiAL5	1460	1466	W box
SpiAL5	57	63	MYB
SpiAL5	1007	1013	MYB
SpiAL5	1308	1314	MYB
SpiAL5	1395	1401	MYB
SpiAL5	1506	1512	MYB
SpiAL5	1535	1541	MYB
SpiAL5	1634	1640	MYB
SpiAL5	1970	1976	MYB
SpiAL5	991	998	P-box
SpiAL5	645	651	LTR
SpiAL5	732	738	G-Box
SpiAL5	800	806	GT1-motif
SpiAL5	1299	1306	GT1-motif
SpiAL5	1301	1307	GT1-motif
SpiAL5	38	44	MYC
SpiAL5	94	100	MYC
SpiAL5	282	288	MYC
SpiAL5	1079	1085	MYC
SpiAL6	62	68	MYC
SpiAL6	177	183	MYC
SpiAL6	230	236	MYC
SpiAL6	284	290	MYC
SpiAL6	823	829	MYC
SpiAL6	1989	1995	GT1-motif
SpiAL6	1752	1759	GCN4_motif
SpiAL6	961	970	GATA-motif
SpiAL6	1161	1168	GATA-motif
SpiAL6	1821	1831	GATA-motif
SpiAL6	305	311	Box 4
SpiAL6	1909	1915	Box 4
SpiAL6	1501	1511	G-box
SpiAL6	553	559	CAT-box
SpiAL7	404	410	MBS
SpiAL7	404	410	Myb
SpiAL7	648	654	Myb
SpiAL7	951	957	Myb
SpiAL7	1910	1919	circadian
SpiAL7	290	296	MYB recognition site
SpiAL7	426	432	MYC
SpiAL7	876	882	GT1-motif
SpiAL7	470	476	LTR
SpiAL7	1173	1182	WUN-motif
SpiAL7	482	488	W box
SpiAL7	928	934	W box
SpiAL7	216	222	MYB
SpiAL7	346	352	MYB
SpiAL7	869	875	MYB
SpiAL7	1540	1546	MYB
SpiAL7	1671	1677	MYB
SpiAL7	1903	1909	MYB
SpiAL8	646	652	MYB
SpiAL8	689	695	MYB
SpiAL8	1294	1300	MYB
SpiAL8	1177	1186	WUN-motif
SpiAL8	1179	1187	WUN-motif
SpiAL8	803	809	MYC
SpiAL8	1225	1231	MYC
SpiAL8	1425	1431	MYC
SpiAL8	331	339	ERE
SpiAL8	733	741	ERE
SpiAL8	1383	1391	ERE
SpiAL8	1436	1444	ERE
SpiAL8	499	505	Box 4
SpiAL8	861	867	Box 4
SpiAL8	1289	1295	Box 4
SpiAL8	1776	1785	ATCT-motif
SpiAL9	1471	1478	P-box
SpiAL9	470	476	ABRE4
SpiAL9	326	335	G-box
SpiAL9	464	470	G-box
SpiAL9	43	50	MRE
SpiAL9	465	470	ABRE
SpiAL9	1726	1732	W box
SpiAL9	1838	1844	W box
SpiAL9	558	564	CAT-box
SpiAL9	173	179	Box 4
SpiAL9	239	245	Box 4
SpiAL9	909	915	Box 4
SpiAL9	1142	1148	Box 4
SpiAL9	1685	1691	Box 4
SpiAL9	558	567	I-box
SpiAL9	464	470	ABRE3a
SpiAL9	194	202	ERE
SpiAL9	1007	1015	ERE
SpiAL9	1375	1383	ERE
SpAL1	1138	1144	MYB
SpAL1	1655	1663	GA-motif
SpAL1	1039	1049	GATA-motif
SpAL1	1131	1137	GT1-motif
SpAL1	186	192	MYC
SpAL1	796	802	MYC
SpAL1	818	824	MYC
SpAL1	1155	1162	Myc
SpAL1	116	125	WUN-motif
SpAL1	308	317	WUN-motif
SpAL1	1720	1728	WUN-motif
SpAL1	1094	1102	ERE
SpAL1	1224	1232	ERE
SpAL1	1390	1398	ERE
SpAL1	1799	1805	CAT-box
SpAL1	340	346	Box 4
SpAL1	888	894	Box 4
SpAL1	918	924	Box 4
SpAL1	1537	1543	Box 4
SpAL2	78	84	MYC
SpAL2	127	133	MYC
SpAL2	1118	1124	MYC
SpAL2	1285	1291	MYC
SpAL2	1345	1351	MYC
SpAL2	143	149	LTR
SpAL2	372	378	MYB
SpAL2	394	400	MYB
SpAL2	1110	1116	MYB
SpAL2	1982	1988	MYB
SpAL2	1030	1037	MRE
SpAL2	71	77	Myb
SpAL2	983	989	Box 4
SpAL2	167	175	ERE
SpAL2	1871	1879	ERE
SpAL3	134	140	CAT-box
SpAL3	677	683	CAT-box
SpAL3	703	709	CAT-box
SpAL3	1115	1121	CAT-box
SpAL3	1779	1785	Box 4
SpAL3	312	319	GCN4_motif
SpAL3	1268	1274	WRE3
SpAL3	1837	1843	MYB recognition site
SpAL3	1853	1859	MYB recognition site
SpAL3	1193	1201	ERE
SpAL3	1345	1353	ERE
SpAL3	1298	1305	Myc
SpAL3	367	373	G-Box
SpAL3	99	105	MYC
SpAL3	337	343	MYC
SpAL3	1736	1742	MYC
SpAL3	374	379	ABRE
SpAL3	1131	1140	ABRE
SpAL3	112	118	MYB
SpAL3	1446	1452	MYB
SpAL3	1710	1716	MYB
SpAL3	145	151	W box
SpAL3	470	476	W box
SpAL3	595	601	W box
SpAL4	528	534	MYC
SpAL4	1864	1870	MYC
SpAL4	1128	1134	G-Box
SpAL4	598	604	G-box
SpAL4	747	753	G-box
SpAL4	891	897	G-box
SpAL4	1013	1019	G-box
SpAL4	1128	1134	G-box
SpAL4	1729	1735	LTR
SpAL4	1059	1065	W box
SpAL4	438	444	MYB
SpAL4	675	681	MYB
SpAL4	932	938	MYB
SpAL4	1372	1378	MYB
SpAL4	1790	1796	MYB
SpAL4	605	610	ABRE
SpAL4	742	747	ABRE
SpAL4	797	804	ABRE
SpAL4	1008	1013	ABRE
SpAL4	1128	1134	ABRE
SpAL4	1135	1140	ABRE
SpAL4	916	923	MRE
SpAL4	582	588	Myb
SpAL4	1110	1116	Box 4
SpAL4	1274	1280	Box 4
SpAL4	183	191	ERE
SpAL4	1632	1640	ERE
SpAL4	532	541	circadian
SpAL5	1707	1715	ERE
SpAL5	1701	1709	ERE
SpAL5	212	218	ABRE3a
SpAL5	1790	1796	GT1-motif
SpAL5	243	249	MYC
SpAL5	738	744	MYC
SpAL5	410	417	P-box
SpAL5	203	211	G-box
SpAL5	212	218	G-box
SpAL5	351	357	LTR
SpAL5	924	930	LTR
SpAL5	206	212	ABRE4
SpAL5	213	218	ABRE
SpAL5	604	610	MYB
SpAL5	969	975	MYB
SpAL5	1797	1803	MYB
SpAL6	103	109	MYB
SpAL6	1065	1071	MYB
SpAL6	1686	1692	MYB
SpAL6	1627	1634	MRE
SpAL6	1797	1804	MRE
SpAL6	1072	1078	GT1-motif
SpAL6	1677	1684	GT1-motif
SpAL6	1679	1685	GT1-motif
SpAL6	303	309	MYC
SpAL6	762	768	MYC
SpAL6	912	918	MYC
SpAL6	1034	1040	MYC
SpAL6	1249	1255	MYC
SpAL6	995	1002	GATA-motif
SpAL6	596	605	WUN-motif
SpAL6	1110	1119	WUN-motif
SpAL6	764	770	G-box
SpAL6	191	198	P-box
SpAL6	200	207	P-box
SpAL6	26	32	Box 4
SpAL6	871	877	Box 4
SpAL6	1146	1152	Myb
SpAL6	1970	1976	CAT-box
SpAL7	1770	1776	ABRE3a
SpAL7	995	1003	ERE
SpAL7	1553	1561	ERE
SpAL7	1803	1811	ERE
SpAL7	667	673	Box 4
SpAL7	782	788	Box 4
SpAL7	857	863	Box 4
SpAL7	1564	1570	Box 4
SpAL7	1468	1474	Myb
SpAL7	1755	1764	I-box
SpAL7	1005	1011	MYB
SpAL7	1183	1189	MYB
SpAL7	1771	1776	ABRE
SpAL7	1824	1829	ABRE
SpAL7	1847	1852	ABRE
SpAL7	1776	1782	ABRE4
SpAL7	1770	1776	G-box
SpAL7	1829	1835	G-box
SpAL7	1852	1858	G-box
SpAL7	352	361	WUN-motif
SpAL7	436	442	MYC
SpAL7	498	504	MYC
SpAL7	900	906	MYC
SpAL7	1817	1823	MYC
SpAL7	1012	1019	GT1-motif
SpAL7	1190	1197	GT1-motif
SpAL8	413	419	Box 4
SpAL8	1656	1662	Box 4
SpAL8	402	408	Myb
SpAL8	913	919	Myb
SpAL8	926	932	Myb
SpAL8	1955	1961	Myb
SpAL8	149	156	GARE-motif
SpAL8	913	919	MBS
SpAL8	1955	1961	MBS
SpAL8	1619	1625	MYB recognition site
SpAL8	1288	1296	ERE
SpAL8	653	662	circadian
SpAL8	1961	1969	WUN-motif
SpAL8	818	824	G-box
SpAL8	453	462	GATA-motif
SpAL8	1339	1345	G-Box
SpAL8	1710	1717	GT1-motif
SpAL8	1712	1718	GT1-motif
SpAL8	606	612	MYC
SpAL8	787	793	MYC
SpAL8	1927	1933	MYC
SpAL8	1038	1045	MRE
SpAL8	1720	1727	MRE
SpAL8	825	830	ABRE
SpAL8	1346	1351	ABRE
SpAL8	1804	1810	W box
SpAL8	156	162	MYB
SpAL8	1097	1103	MYB
SpAL8	1107	1113	MYB
SpAL8	1147	1153	MYB
SpAL8	1231	1237	MYB
SpAL9	1471	1478	P-box
SpAL9	470	476	ABRE4
SpAL9	326	335	G-box
SpAL9	464	470	G-box
SpAL9	43	50	MRE
SpAL9	465	470	ABRE
SpAL9	1726	1732	W box
SpAL9	1838	1844	W box
SpAL9	558	564	CAT-box
SpAL9	173	179	Box 4
SpAL9	239	245	Box 4
SpAL9	909	915	Box 4
SpAL9	1142	1148	Box 4
SpAL9	1685	1691	Box 4
SpAL9	558	567	I-box
SpAL9	464	470	ABRE3a
SpAL9	194	202	ERE
SpAL9	1007	1015	ERE
SpAL9	1375	1383	ERE
SpAL10	648	653	ABRE
SpAL10	105	111	MYB
SpAL10	1305	1311	MYB
SpAL10	653	659	G-box
SpAL10	80	87	Myc
SpAL10	58	67	WUN-motif
SpAL10	1189	1198	WUN-motif
SpAL10	1191	1199	WUN-motif
SpAL10	98	104	GT1-motif
SpAL10	330	336	MYC
SpAL10	1237	1243	MYC
SpAL10	1432	1438	MYC
SpAL10	274	282	ERE
SpAL10	799	807	ERE
SpAL10	1390	1398	ERE
SpAL10	1443	1451	ERE
SpAL10	974	980	Box 4
SpAL10	1680	1686	Box 4
SpAL10	1984	1990	Myb
SpAL10	1984	1990	MBS
SpAL11	1728	1737.5	Gap-box
SpAL11	1157	1165	ERE
SpAL11	1773	1781	ERE
SpAL11	1673	1682	circadian
SpAL11	247	253	Box 4
SpAL11	1140	1146	Box 4
SpAL11	1220	1226	Box 4
SpAL11	451	457	CAT-box
SpAL11	927	933	CAT-box
SpAL11	694	703	I-box
SpAL11	1554	1563	ATCT-motif
SpAL11	1541	1549	GA-motif
SpAL11	658	664	MYB
SpAL11	1048	1054	MYB
SpAL11	1507	1513	MYB
SpAL11	715	720	ABRE
SpAL11	989	994	ABRE
SpAL11	1010	1015	ABRE
SpAL11	708	714	G-box
SpAL11	397	404	P-box
SpAL11	1722	1728	MYC
SpAL11	1659	1669	GATA-motif
SpAL11	994	1000	G-Box
SpAL11	1003	1009	G-Box
SlydAL1	1894	1901	Myc
SlydAL1	435	443	G-box
SlydAL1	436	442	G-box
SlydAL1	436	442	G-Box
SlydAL1	466	472	G-Box
SlydAL1	95	102	GT1-motif
SlydAL1	97	103	GT1-motif
SlydAL1	198	204	MYC
SlydAL1	62	70	GA-motif
SlydAL1	436	442	ABRE
SlydAL1	437	442	ABRE
SlydAL1	473	478	ABRE
SlydAL1	1585	1595	ABRE
SlydAL1	244	250	W box
SlydAL1	696	702	W box
SlydAL1	104	110	MYB
SlydAL1	1560	1566	MYB
SlydAL1	233	239	CAT-box
SlydAL1	778	784	CAT-box
SlydAL1	804	810	CAT-box
SlydAL1	1222	1228	CAT-box
SlydAL1	1756	1762	Box 4
SlydAL1	211	217	Myb
SlydAL1	411	418	GCN4_motif
SlydAL1	1630	1639	ATCT-motif
SlydAL1	211	217	MBS
SlydAL1	1323	1331	ERE
SlydAL1	1422	1430	ERE
SlydAL2	729	734	ABRE
SlydAL2	606	612	MYB
SlydAL2	638	644	MYB
SlydAL2	1795	1801	MYB
SlydAL2	840	846	G-box
SlydAL2	958	964	LTR
SlydAL2	1239	1245	LTR
SlydAL2	1609	1616	GATA-motif
SlydAL2	722	728	G-Box
SlydAL2	170	176	MYC
SlydAL2	546	552	MYC
SlydAL2	1468	1474	MYC
SlydAL2	946	952	GT1-motif
SlydAL2	1699	1707	ERE
SlydAL2	1812	1820	ERE
SlydAL3	1176	1184	ERE
SlydAL3	183	189	Myb
SlydAL3	1137	1143	Myb
SlydAL3	73	79	Box 4
SlydAL3	958	964	Box 4
SlydAL3	1793	1800	MRE
SlydAL3	148	154	MYB
SlydAL3	564	570	MYB
SlydAL3	1092	1098	MYB
SlydAL3	1144	1150	MYB
SlydAL3	679	688	WUN-motif
SlydAL3	1427	1433	LTR
SlydAL3	268	275	P-box
SlydAL3	1151	1157	GT1-motif
SlydAL3	845	851	MYC
SlydAL3	1001	1007	MYC
SlydAL3	1324	1330	MYC
SlydAL3	1565	1571	MYC
SlydAL4	1036	1042	MBS
SlydAL4	534	540	Myb
SlydAL4	1036	1042	Myb
SlydAL4	1049	1055	Myb
SlydAL4	1954	1960	Myb
SlydAL4	545	551	Box 4
SlydAL4	1589	1595	Box 4
SlydAL4	1593	1599	Box 4
SlydAL4	585	594	GATA-motif
SlydAL4	1032	1041	GATA-motif
SlydAL4	1710	1717	GT1-motif
SlydAL4	1712	1718	GT1-motif
SlydAL4	306	312	MYC
SlydAL4	904	910	MYC
SlydAL4	1403	1409	MYC
SlydAL4	1927	1933	MYC
SlydAL4	1651	1657	G-box
SlydAL4	1960	1968	WUN-motif
SlydAL4	1658	1663	ABRE
SlydAL4	1440	1446	MYB
SlydAL4	1805	1811	W box
SlydAL4	1155	1162	MRE
SlydAL4	1720	1727	MRE
SlydAL5	157	163	G-Box
SlydAL5	953	959	G-Box
SlydAL5	1234	1240	G-Box
SlydAL5	1539	1545	MYC
SlydAL5	145	155	G-box
SlydAL5	157	163	G-box
SlydAL5	952	960	G-box
SlydAL5	953	959	G-box
SlydAL5	976	982	G-box
SlydAL5	1135	1141	G-box
SlydAL5	1211	1217	G-box
SlydAL5	1234	1240	G-box
SlydAL5	157	163	ABRE
SlydAL5	158	163	ABRE
SlydAL5	951	960	ABRE
SlydAL5	953	959	ABRE
SlydAL5	954	959	ABRE
SlydAL5	971	976	ABRE
SlydAL5	1130	1135	ABRE
SlydAL5	1218	1223	ABRE
SlydAL5	1229	1238	ABRE
SlydAL5	1234	1240	ABRE
SlydAL5	1241	1246	ABRE
SlydAL5	677	683	W box
SlydAL5	1710	1716	W box
SlydAL5	1841	1847	W box
SlydAL5	167	176	I-box
SlydAL5	894	904	I-box
SlydAL5	1284	1294	I-box
SlydAL5	851	857	Myb
SlydAL5	1336	1342	Myb
SlydAL5	308	314	Box 4
SlydAL5	202	210	ERE
SlydAL5	643	651	ERE
SlydAL5	637	645	ERE
SlydAL5	752	760	ERE
SlydAL5	1770	1778	ERE
SlydAL6	512	518	MYB
SlydAL6	703	709	MYB
SlydAL6	164	172	ERE
SlydAL6	158	166	ERE
SlydAL6	877	883	MYC
SlydAL6	889	895	MYC
SlydAL6	1487	1493	MYC
SlydAL6	652	659	Myc
SlydAL6	851	859	WUN-motif
SlydAL6	1849	1855	LTR
SlydAL6	50	56	Box 4
SlydAL6	262	268	Box 4
SlydAL6	947	953	Box 4
SlydAL6	1204	1210	Box 4
SlydAL6	1381	1387	Box 4
SlydAL6	1659	1665	Box 4
SlydAL7	204	212	ERE
SlydAL7	198	206	ERE
SlydAL7	303	309	Box 4
SlydAL7	961	967	Box 4
SlydAL7	1210	1216	Box 4
SlydAL7	1389	1395	Box 4
SlydAL7	1661	1667	Box 4
SlydAL7	542	548	MYB
SlydAL7	716	722	MYB
SlydAL7	1892	1898	MYB
SlydAL7	890	896	MYC
SlydAL7	902	908	MYC
SlydAL7	1493	1499	MYC
SlydAL7	864	872	WUN-motif
SlydAL7	665	672	Myc
SlydAL7	1849	1855	LTR
SlydAL8	46	52	G-box
SlydAL8	197	203	G-box
SlydAL8	957	963	G-box
SlydAL8	40	46	ABRE4
SlydAL8	1717	1723	MYC
SlydAL8	107	113	W box
SlydAL8	70	76	MYB
SlydAL8	1299	1305	MYB
SlydAL8	44	53	ABRE
SlydAL8	47	52	ABRE
SlydAL8	964	969	ABRE
SlydAL8	458	464	Box 4
SlydAL8	663	669	CAT-box
SlydAL8	1177	1183	CAT-box
SlydAL8	1549	1558	ATCT-motif
SlydAL8	46	52	ABRE3a
SlydAL8	1828	1836	ERE
SlydAL8	1822	1830	ERE
