# Supplementary material for: Identification and Expression Analysis of the Alfin-like Gene Family in Tomato and the Role of SlAL3 in Salt and Drought Stresses
Source: Plants (Basel). 2023 Jul 31;12(15):2829. doi: 10.3390/plants12152829 (PMC10421131; doi:10.3390/plants12152829)
Supplement: Supplementary file 1 [file plants-12-02829-s001.zip › Table S4.xlsx]

## Sheet: Sheet1
Table S4. Gene duplication, Ks, Ka and Ka/Ks values calculated for paralogous ALs gene pairs in tomato
Species	Chr	Duplicated gene pairs	Ka	Ks	Ka/Ks	Selective pressure	Duplication Type	Time (Mya)
S.lycopersicum	SlChr1/SlChr1	SlAL1&SlAL2	0.03	0.29	0.1	Purify Selection	tandem	9.67
	SlChr3/SlChr6	SlAL3&SlAL6	0.24	0.68	0.35	Purify Selection	segmental	22.67
	SlChr10/SlChr10	SlAL9&SlAL10	0.1	1.14	0.09	Purify Selection	segmental	38
S.lycopersicoides	SlydChr3/SlydChr6	SlydAL1&SlydAL3	0.27	0.83	0.32	Purify Selection	segmental	27.67
S.pimpinellifolium	SpiChr1/SPiChr1	SPiAL1&SPiAL2	0.04	0.3	0.13	Purify Selection	tandem	10
	SpiChr3/SPiChr6	SPiAL3&SPiAL6	0.24	0.67	0.35	Purify Selection	segmental	22.33
S. pennellii	SpChr1/SpChr1	SpAL1&SpAL2	0.03	0.27	0.11	Purify Selection	tandem	9
	SpChr10/SpChr10	SpAL9&SpAL10	0.1	1.32	0.08	Purify Selection	segmental	44
	SpChr3/SpChr6	SpAL3&SpAL6	0.24	0.65	0.37	Purify Selection	segmental	21.67
