# Supplementary material for: Identification and Expression Analysis of the Alfin-like Gene Family in Tomato and the Role of SlAL3 in Salt and Drought Stresses
Source: Plants (Basel). 2023 Jul 31;12(15):2829. doi: 10.3390/plants12152829 (PMC10421131; doi:10.3390/plants12152829)
Supplement: Supplementary file 1 [file plants-12-02829-s001.zip › Table S5.xlsx]

## Sheet: Sheet1
Table S5. Direct homology of AL genes in multiple species
specie 1	specie 2
SlAL9	SlydAL4
SlAL9	SlydAL5
SlAL10	SlydAL5
SlAL11	SlydAL3
SlAL11	SlydAL8
SlAL3	SlydAL1
SlAL3	SlydAL3
SlAL6	SlydAL1
SlAL6	SlydAL3
SlAL5	SlydAL2
SlAL7	SlydAL1
SlAL8	SlydAL4
SlAL1	SpAL1
SlAL9	SpAL8
SlAL9	SpAL9
SlAL10	SpAL10
SlAL9	SpAL10
SlAL10	SpAL9
SlAL11	SpAL11
SlAL3	SpAL3
SlAL3	SpAL6
SlAL6	SpAL3
SlAL5	SpAL5
SlAL6	SpAL6
SlAL7	SpAL6
SlAL7	SpAL7
SlAL8	SpAL8
SPiAL1	SlAL1
SPiAL3	SlAL3
SPiAL3	SlAL6
SPiAL3	SlAL7
SPiAL6	SlAL11
SPiAL6	SlAL3
SPiAL5	SlAL5
SPiAL6	SlAL6
SPiAL7	SlAL7
SPiAL8	SlAL10
SPiAL8	SlAL9
SPiAL9	SlAL11
SPiAL3	SlydAL1
SPiAL3	SlydAL3
SPiAL6	SlydAL1
SPiAL6	SlydAL3
SPiAL5	SlydAL2
SPiAL6	SlydAL8
SPiAL8	SlydAL5
SPiAL9	SlydAL3
SPiAL9	SlydAL8
SlydAL1	SpAL3
SlydAL1	SpAL6
SlydAL3	SpAL3
SlydAL3	SpAL6
SlydAL2	SpAL5
SlydAL3	SpAL11
SlydAL4	SpAL8
SlydAL4	SpAL9
SlydAL5	SpAL9
SlydAL5	SpAL10
SlydAL8	SpAL11
SPiAL1	SpAL1
SPiAL3	SpAL3
SPiAL3	SpAL6
SPiAL6	SpAL3
SPiAL5	SpAL5
SPiAL6	SpAL6
SPiAL7	SpAL7
SPiAL8	SpAL10
SPiAL8	SpAL9
SPiAL9	SpAL11
