# Supplementary material for: Identification and Expression Analysis of the Alfin-like Gene Family in Tomato and the Role of SlAL3 in Salt and Drought Stresses
Source: Plants (Basel). 2023 Jul 31;12(15):2829. doi: 10.3390/plants12152829 (PMC10421131; doi:10.3390/plants12152829)
Supplement: Supplementary file 1 [file plants-12-02829-s001.zip › Table S6.xlsx]

## Sheet: Sheet1
Table S6. Expression of AL genes in different tissues
gene	gene name	Heinz_flower	Heinz_leaf	Heinz_root	Heinz_1cm_fruit	Heinz_2cm_fruit	Heinz_3cm_fruit	Heinz_bud	Heinz_MG	Heinz_B	Heinz_B10
Solyc01g102750	SlAL1	40.96	33.08	29.35	39.81	32.49	34.25	47.37	37.73	49.33	63.84
Solyc01g102760	SlAL2	63.84	39.4	46.79	65.14	42.05	36.04	67.65	35.79	31.37	36.42
Solyc03g121930	SlAL3	10.04	3.38	6.83	6.1	2.49	2.05	8.24	1.22	1.34	0.94
Solyc05g032770	SlAL4	13.34	12.28	16.66	18.76	8.39	9.97	19.76	6.23	2.36	6.33
Solyc06g051420	SlAL5	36.42	18.69	37.73	38.18	32.08	37.41	33.32	28.85	28.5	32.99
Solyc06g062850	SlAL6	19.68	12.24	13.45	14.94	12.17	13.6	16.6	10.04	13.12	20.46
Solyc07g041190	SlAL7	21.72	24.8	9.54	24.43	32.9	106.07	33.97	29.61	53	52.53
Solyc09g005360	SlAL8	27.1	24.62	39.86	39.25	30.16	26.12	38.91	25.27	19.23	16.74
Solyc10g076690	SlAL9	39.67	33.73	32.85	35.9	25.58	23.85	57.68	18.98	13.56	12.03
Solyc10g085180	SlAL10	17.75	10.6	18.63	12.6	11.88	8.5	17.91	11.97	14.63	17.72
Solyc12g096040	SlAL11	18.74	8.37	25.56	36.61	31.23	26.19	20.19	23.58	17.56	37.1
