# Supplementary material for: Identification and Expression Analysis of the Alfin-like Gene Family in Tomato and the Role of SlAL3 in Salt and Drought Stresses
Source: Plants (Basel). 2023 Jul 31;12(15):2829. doi: 10.3390/plants12152829 (PMC10421131; doi:10.3390/plants12152829)
Supplement: Supplementary file 1 [file plants-12-02829-s001.zip › Table S7.xlsx]

## Sheet: Sheet1
Table S7. List of primers used for this article
	Primer List
Gene id	Forward primer(5' to 3')	Reverse primer(5' to 3')
SlACT	CTCTACATACTTGAGAGGTGCC	AGACGAGGAGAAAACATCACAA
SlAL1	CACGTGATGCTCCTCACAAC	GAGTTGCGCCTTGTTCATCC
SlAL2	ACTTCCGGAGCCAGCATTAG	CCGTGCGCCAAAGTAGAATG
SlAL3	AGCGATGGGAGGTCAATCTG	TCTAGCACCAGCGTAGAAGG
SlAL4	GGATTTCCAAGCGAGCAATGG	CTAGGGCCAACCAGTCCTTT
SlAL5	GGATGGAGCGTAGAGACTGG	TCAGGGTAAACACACGACTCC
SlAL7	GCACAGTACAATCCTCGCAC	TGACTTCCCACTGCTCACTTG
SlAL8	GCTTTCCCTGGTTGCTGTTC	ACAGTTGGCACCTCGTTGAT
SlAL9	GAAGTCCCACCTGAGCTACC	GCCACAGAAAGCAACCAACAA
SlAL10	GGGAGCAAATCCCGTGGTAG	CACAGCATCCGCAAAGTGTT
Super1300-GFP-SlAL3	GCTCTAGAATGGAATTTGGAGCTA	GGGGTACCGTATTCTGTAAAGTGAG
