# Supplementary figures and images for: Identification and Expression Analysis of the Alfin-like Gene Family in Tomato and the Role of SlAL3 in Salt and Drought Stresses
Source: MDPI journal article supplement (doi:10.3390/plants12152829), 2023-07-31

**Figure S1.** Phylogenetic tree.

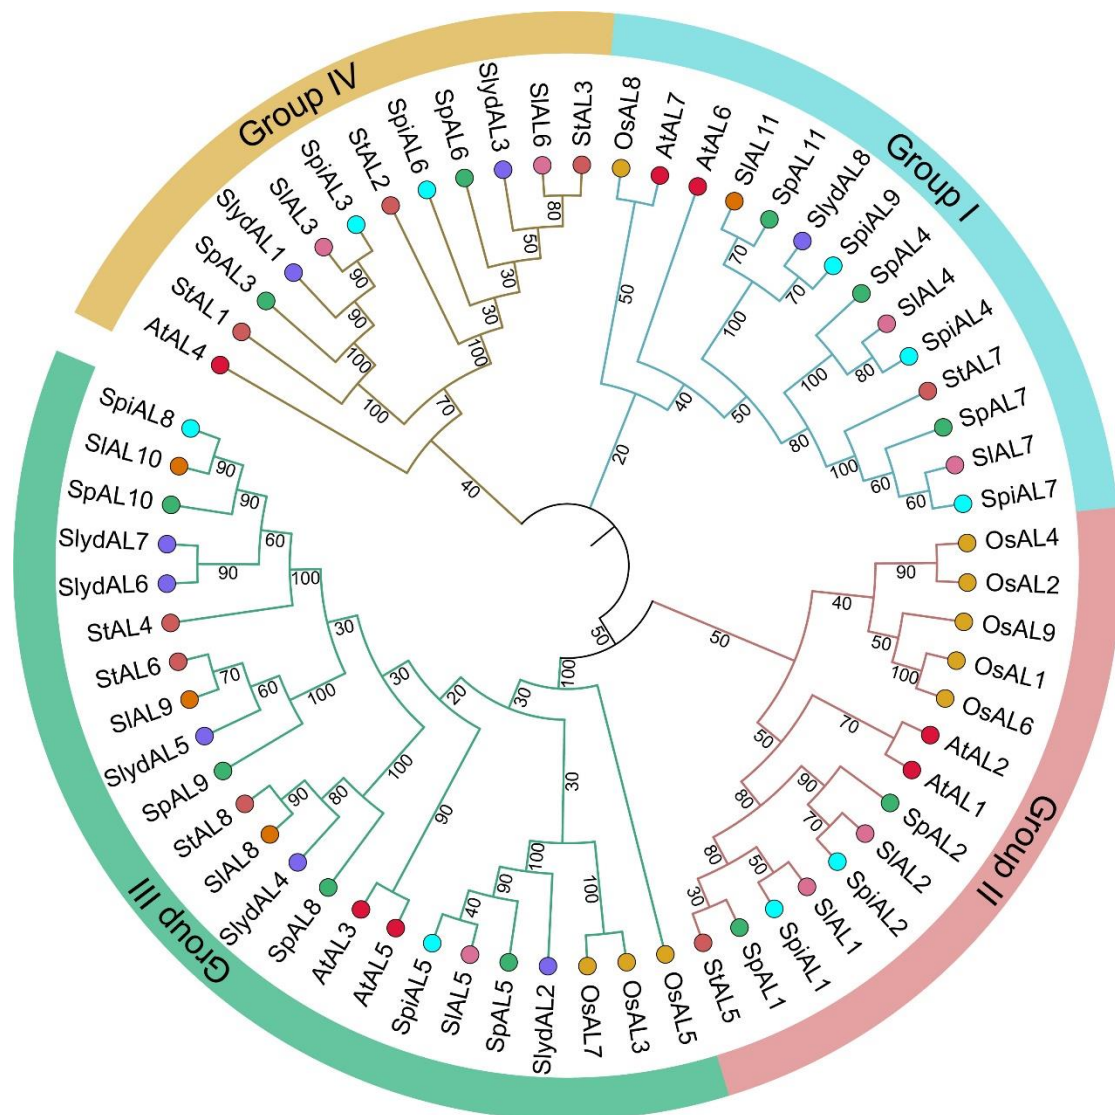

Figure S2. Motif result graph.

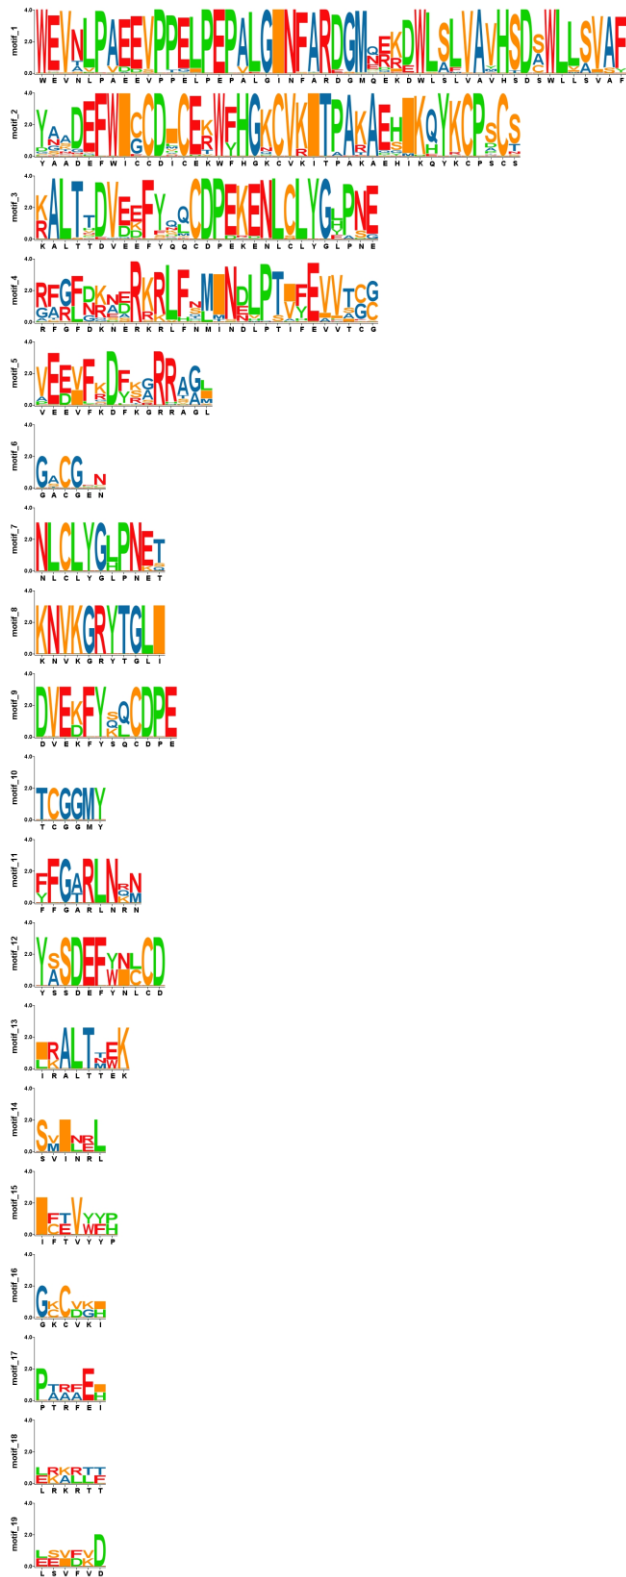

Supplement: s1 [file s1]
